# Supplementary material for: An assessment of implementation science research capacity in Uganda
Source: PubMed Central journal article supplement (PMC7869465; doi:10.1186/s12961-020-00653-2), 2021-02-08
Supplement: 12961_2020_653_MOESM1_ESM.pdf [file 12961_2020_653_MOESM1_ESM.pdf]

| Participant ID#                                                                                                                                    | Date of Interview                                                                                                                                                                                                                                         | Interviewer's Initials                                         |
|----------------------------------------------------------------------------------------------------------------------------------------------------|-----------------------------------------------------------------------------------------------------------------------------------------------------------------------------------------------------------------------------------------------------------|----------------------------------------------------------------|
| <input type="text"/> | <input type="text"/> <input type="text"/> / <input type="text"/> <input type="text"/> <input type="text"/> / <input type="text"/> <input type="text"/> <input type="text"/> <input type="text"/><br>DD                      MMM                      YYYY | <input type="text"/> <input type="text"/> <input type="text"/> |

## IMPLEMENTATION SCIENCE NEEDS ASSESSMENT QUESTIONNAIRE

| Demographic Information                                                                                                                                                                                                                                                                                    |                                                                                                                                                               |                                                                                                                                                                                                                                                                                                                                                                                                                                            |
|------------------------------------------------------------------------------------------------------------------------------------------------------------------------------------------------------------------------------------------------------------------------------------------------------------|---------------------------------------------------------------------------------------------------------------------------------------------------------------|--------------------------------------------------------------------------------------------------------------------------------------------------------------------------------------------------------------------------------------------------------------------------------------------------------------------------------------------------------------------------------------------------------------------------------------------|
| <b>1. What is your date of birth</b><br><br><input type="text"/> <input type="text"/> / <input type="text"/> <input type="text"/> <input type="text"/> / <input type="text"/> <input type="text"/> <input type="text"/> <input type="text"/><br>DD                      MMM                      YYYY      | <b>2. Sex</b><br><br><input type="checkbox"/> Male<br><input type="checkbox"/> Female                                                                         | <b>3. What is your current primary position at Makerere University?</b><br><br><input type="checkbox"/> Faculty<br><input type="checkbox"/> Postgraduate → <i>Skip to 5</i><br><input type="checkbox"/> Project staff<br><input type="checkbox"/> Other Non Makerere staff                                                                                                                                                                 |
| <b>4. If Faculty, Project staff or Other Non-Makerere staff, Are you also a postgraduate student?</b><br><br><input type="checkbox"/> Yes<br><input type="checkbox"/> No → <i>Skip to 7</i>                                                                                                                | <b>5. What is your level of Postgraduate training?</b><br><br><input type="checkbox"/> Master's Student<br><input type="checkbox"/> PhD student               | <b>6. What Makerere University department were you attached to as a Postgraduate student?</b><br><i>Go to 11 if project or Non Makerere staff.</i><br><br>_____<br>_____                                                                                                                                                                                                                                                                   |
| <b>7. Within which College of Makerere University are you a faculty?</b><br><br><i>Skip if postgraduate student, project or Non Makerere staff</i><br><br>_____<br>_____                                                                                                                                   | <b>8. What School within Makerere University are you faculty?</b><br><i>Skip if postgraduate student, project or Non Makerere staff</i><br><br>_____<br>_____ | <b>9. What department do you belong to?</b><br><i>Skip if postgraduate student, project or Non Makerere staff</i><br><br>_____<br>_____                                                                                                                                                                                                                                                                                                    |
| <b>10. What is your Faculty position?</b><br><br>→ <i>Skip to 13 for Faculty</i><br><br><input type="checkbox"/> Assistant Lecturer<br><input type="checkbox"/> Lecturer<br><input type="checkbox"/> Senior Lecturer<br><input type="checkbox"/> Associate Professor<br><input type="checkbox"/> Professor | <b>11. Where do you hold the primary position?</b><br><i>Skip for all Faculty</i><br><br>_____<br>_____                                                       | <b>12. What is your position at our place of work?</b><br><i>Skip for all Faculty</i><br><br>_____<br>_____                                                                                                                                                                                                                                                                                                                                |
| <b>13. What is your most recent Academic qualification?</b><br><br><input type="checkbox"/> Master's degree<br><input type="checkbox"/> PhD                                                                                                                                                                | <b>14. Which year did you obtain this qualification?</b><br><br><input type="text"/> <input type="text"/> <input type="text"/> <input type="text"/>           | <b>15. Where did you obtain this qualification?</b><br><input type="checkbox"/> Makerere University<br><input type="checkbox"/> Other University in Uganda<br><input type="checkbox"/> Other University in Africa<br><input type="checkbox"/> Other University in Europe<br><input type="checkbox"/> Other University in US<br><input type="checkbox"/> Other University in Asia<br><input type="checkbox"/> Other University in Australia |

| Participant ID#                                                                                                                                    | Date of Interview                                                                                                                                                                                                                                         | Interviewer's Initials                                         |
|----------------------------------------------------------------------------------------------------------------------------------------------------|-----------------------------------------------------------------------------------------------------------------------------------------------------------------------------------------------------------------------------------------------------------|----------------------------------------------------------------|
| <input type="text"/> | <input type="text"/> <input type="text"/> / <input type="text"/> <input type="text"/> <input type="text"/> / <input type="text"/> <input type="text"/> <input type="text"/> <input type="text"/><br>DD                      MMM                      YYYY | <input type="text"/> <input type="text"/> <input type="text"/> |

| Previous Clinical research training and current practice                                                                                                                                                                                                                                                                   |                                                                                                                                                                                                                                                                                                                                                                |                                                                                                                                                                                                                                                                                                                                                                                                 |                          |                          |                          |
|----------------------------------------------------------------------------------------------------------------------------------------------------------------------------------------------------------------------------------------------------------------------------------------------------------------------------|----------------------------------------------------------------------------------------------------------------------------------------------------------------------------------------------------------------------------------------------------------------------------------------------------------------------------------------------------------------|-------------------------------------------------------------------------------------------------------------------------------------------------------------------------------------------------------------------------------------------------------------------------------------------------------------------------------------------------------------------------------------------------|--------------------------|--------------------------|--------------------------|
| <b>16. Have you had any training in epidemiology?</b><br><br><input type="checkbox"/> Yes<br><br><input type="checkbox"/> No → <u>Skip to 20</u>                                                                                                                                                                           | <b>17. What was the duration of Epidemiology training?</b><br><br><input type="text"/> <input type="text"/> <input type="text"/> Days<br><input type="text"/> <input type="text"/> <input type="text"/> Weeks<br><input type="text"/> <input type="text"/> <input type="text"/> Months<br><input type="text"/> <input type="text"/> <input type="text"/> Years | <b>18. What was the nature of the Epidemiology training?</b><br><br><input type="checkbox"/> Specialized Master degree<br><input type="checkbox"/> Specialized PhD degree<br><input type="checkbox"/> Course undergraduate<br><input type="checkbox"/> Course unit in Master's training<br><input type="checkbox"/> Course unit in PhD training<br><input type="checkbox"/> Certificate course  |                          |                          |                          |
| <b>19. What qualification did the Epidemiology training lead to?</b><br><br><input type="checkbox"/> Certificate<br><input type="checkbox"/> Master's Degree<br><input type="checkbox"/> PhD<br><input type="checkbox"/> None (just part of other training)                                                                | <b>20. Have you had any training in Biostatistics?</b><br><br><input type="checkbox"/> Yes<br><input type="checkbox"/> No → <u>Skip to 22</u>                                                                                                                                                                                                                  | <b>21. What was the nature of the Biostatistics training?</b><br><br><input type="checkbox"/> Specialized Master degree<br><input type="checkbox"/> Specialized PhD degree<br><input type="checkbox"/> Course undergraduate<br><input type="checkbox"/> Course unit in Master's training<br><input type="checkbox"/> Course unit in PhD training<br><input type="checkbox"/> Certificate course |                          |                          |                          |
| <b>22. How many concluded research studies have you participated in the past 3 years?</b><br><i>If answer is 0, Go to 26</i><br><br><input type="text"/> <input type="text"/> <input type="text"/>                                                                                                                         | <b>23. Of these studies, how many did you initiate on your own?</b><br><i>Skip if answer is 0 in 22</i><br><br><input type="text"/> <input type="text"/> <input type="text"/>                                                                                                                                                                                  | <b>24. How many were initiated by others and you just participated?</b> <i>Skip if answer is 0 in 22</i><br><br><input type="text"/> <input type="text"/> <input type="text"/>                                                                                                                                                                                                                  |                          |                          |                          |
| <b>25. For the studies in 22 above, what was your role?</b><br><i>Skip if answer is 0 in 22</i><br><input type="checkbox"/> Study coordinator<br><input type="checkbox"/> Investigator<br><input type="checkbox"/> Research assistant<br><input type="checkbox"/> Biostatistician<br><input type="checkbox"/> Other: _____ | <b>26. How many ongoing studies are you currently involved in?</b><br><i>If answer is 0, Go to 28</i><br><br><input type="text"/> <input type="text"/> <input type="text"/>                                                                                                                                                                                    | <b>27. For the studies in 26 above, what was your role?</b><br><i>Skip if answer is 0 in 26</i><br><input type="checkbox"/> Study coordinator<br><input type="checkbox"/> Investigator<br><input type="checkbox"/> Research assistant<br><input type="checkbox"/> Biostatistician<br><input type="checkbox"/> Other: _____                                                                      |                          |                          |                          |
| <b>28. How many peer reviewed research publications have you participated in writing?</b><br><br><input type="text"/> <input type="text"/> <input type="text"/>                                                                                                                                                            | <b>29. Of these, for how many are you the first author?</b><br><i>Skip if answer is 0 in 28</i><br><br><input type="text"/> <input type="text"/> <input type="text"/>                                                                                                                                                                                          | <b>30. How many abstracts have you prepared and presented in the last 2 years?</b><br><br><input type="text"/> <input type="text"/> <input type="text"/>                                                                                                                                                                                                                                        |                          |                          |                          |
| <b>31. How many grant applications have you prepared in the last 2 years?</b> <i>If answer is 0 → Skip to 34</i><br><br><input type="text"/> <input type="text"/> <input type="text"/>                                                                                                                                     | <b>32. Of these how many were funded?</b><br><i>Skip if answer is 0 in 31</i><br><br><input type="text"/> <input type="text"/> <input type="text"/>                                                                                                                                                                                                            | <b>33. Of the applications in 31, how many did you initiate?</b><br><i>Skip if answer is 0 in 31</i><br><br><input type="text"/> <input type="text"/> <input type="text"/>                                                                                                                                                                                                                      |                          |                          |                          |
| <b>34. Self-evaluation of research core competencies:</b><br>On a scale of 1-5, with (1 being very poor and 5 is excellent) how would you grade yourself in terms of research core competencies listed. For each competency choose one response.                                                                           |                                                                                                                                                                                                                                                                                                                                                                |                                                                                                                                                                                                                                                                                                                                                                                                 |                          |                          |                          |
| Core competency                                                                                                                                                                                                                                                                                                            | Excellent (5)                                                                                                                                                                                                                                                                                                                                                  | Good (4)                                                                                                                                                                                                                                                                                                                                                                                        | Fair (3)                 | Poor (2)                 | Very Poor (1)            |
| a. Extracting literature from appropriate bibliographic sources.                                                                                                                                                                                                                                                           | <input type="checkbox"/>                                                                                                                                                                                                                                                                                                                                       | <input type="checkbox"/>                                                                                                                                                                                                                                                                                                                                                                        | <input type="checkbox"/> | <input type="checkbox"/> | <input type="checkbox"/> |
| b. Critiquing clinical and scientific evidence derived from literature.                                                                                                                                                                                                                                                    | <input type="checkbox"/>                                                                                                                                                                                                                                                                                                                                       | <input type="checkbox"/>                                                                                                                                                                                                                                                                                                                                                                        | <input type="checkbox"/> | <input type="checkbox"/> | <input type="checkbox"/> |
| c. Generating relevant biomedical, clinical, public health, or translational research hypothesis.                                                                                                                                                                                                                          | <input type="checkbox"/>                                                                                                                                                                                                                                                                                                                                       | <input type="checkbox"/>                                                                                                                                                                                                                                                                                                                                                                        | <input type="checkbox"/> | <input type="checkbox"/> | <input type="checkbox"/> |
| d. Choosing the appropriated research Designs to address generated research questions                                                                                                                                                                                                                                      | <input type="checkbox"/>                                                                                                                                                                                                                                                                                                                                       | <input type="checkbox"/>                                                                                                                                                                                                                                                                                                                                                                        | <input type="checkbox"/> | <input type="checkbox"/> | <input type="checkbox"/> |
| e. Evaluating possible problems in the design and execution of a study                                                                                                                                                                                                                                                     | <input type="checkbox"/>                                                                                                                                                                                                                                                                                                                                       | <input type="checkbox"/>                                                                                                                                                                                                                                                                                                                                                                        | <input type="checkbox"/> | <input type="checkbox"/> | <input type="checkbox"/> |

| Participant ID#                                                                                                                                    | Date of Interview                                                                                                                                                                                                                                         | Interviewer's Initials                                         |
|----------------------------------------------------------------------------------------------------------------------------------------------------|-----------------------------------------------------------------------------------------------------------------------------------------------------------------------------------------------------------------------------------------------------------|----------------------------------------------------------------|
| <input type="text"/> | <input type="text"/> <input type="text"/> / <input type="text"/> <input type="text"/> <input type="text"/> / <input type="text"/> <input type="text"/> <input type="text"/> <input type="text"/><br>DD                      MMM                      YYYY | <input type="text"/> <input type="text"/> <input type="text"/> |

|                                                                                                                                                |                          |                          |                          |                          |                          |
|------------------------------------------------------------------------------------------------------------------------------------------------|--------------------------|--------------------------|--------------------------|--------------------------|--------------------------|
| f. Developing appropriate methods to recruit and retain study participants for a selected research design                                      | <input type="checkbox"/> | <input type="checkbox"/> | <input type="checkbox"/> | <input type="checkbox"/> | <input type="checkbox"/> |
| g. Utilize appropriate data collection methods to generated data required both qualitative and quantitative research                           | <input type="checkbox"/> | <input type="checkbox"/> | <input type="checkbox"/> | <input type="checkbox"/> | <input type="checkbox"/> |
| h. Applying fundamental principles of statistical analysis, such as power analysis, correlation, causation, regression, and summary statistics | <input type="checkbox"/> | <input type="checkbox"/> | <input type="checkbox"/> | <input type="checkbox"/> | <input type="checkbox"/> |
| i. Apply appropriate principles for qualitative data analysis                                                                                  | <input type="checkbox"/> | <input type="checkbox"/> | <input type="checkbox"/> | <input type="checkbox"/> | <input type="checkbox"/> |
| j. Selecting the appropriate statistical approach for the interpretation of preclinical and clinical datasets                                  | <input type="checkbox"/> | <input type="checkbox"/> | <input type="checkbox"/> | <input type="checkbox"/> | <input type="checkbox"/> |
| k. Developing appropriate conclusions based on results from research data                                                                      | <input type="checkbox"/> | <input type="checkbox"/> | <input type="checkbox"/> | <input type="checkbox"/> | <input type="checkbox"/> |
| l. Presentation and Delivery of Oral and Written Scientific Information                                                                        | <input type="checkbox"/> | <input type="checkbox"/> | <input type="checkbox"/> | <input type="checkbox"/> | <input type="checkbox"/> |
| m. Scientific Leadership, Management, and Cross-Disciplinary Teamwork in study design and implementation                                       | <input type="checkbox"/> | <input type="checkbox"/> | <input type="checkbox"/> | <input type="checkbox"/> | <input type="checkbox"/> |
| n. Ethical Conduct in the design and implementation of studies.                                                                                | <input type="checkbox"/> | <input type="checkbox"/> | <input type="checkbox"/> | <input type="checkbox"/> | <input type="checkbox"/> |

| Awareness, knowledge about and interest in ImSc training                        |                                                                                     |
|---------------------------------------------------------------------------------|-------------------------------------------------------------------------------------|
| 35. Have you heard about Implementation Science?                                | 36. What have you heard about ImSc?                                                 |
| <input type="checkbox"/> Yes<br><input type="checkbox"/> No → <u>Skip to 45</u> | <hr/> <hr/> <hr/>                                                                   |
| 37. How did you get to hear about ImSc?                                         | 38. Can you define Implementation science?                                          |
| <hr/> <hr/> <hr/>                                                               | <hr/> <hr/> <hr/>                                                                   |
| 39. Have you had any training in Implementation Science?                        | 40. Describe the training have you received?                                        |
| <input type="checkbox"/> Yes<br><input type="checkbox"/> No → <u>Skip to 45</u> | <hr/> <hr/> <hr/>                                                                   |
| 41. Where did you receive this training?                                        | 42. Did you attain any qualification at the end of the training, if so what was it? |
| <hr/> <hr/>                                                                     | <hr/> <hr/>                                                                         |
| 43. Describe what you learnt during your training in ImSc?                      | 44. What areas of ImSc are you currently using in your research?                    |
| <hr/> <hr/>                                                                     | <hr/> <hr/>                                                                         |

| Participant ID#                                                                                                                                    | Date of Interview                                                                                                                                                                                                                                         | Interviewer's Initials                                         |
|----------------------------------------------------------------------------------------------------------------------------------------------------|-----------------------------------------------------------------------------------------------------------------------------------------------------------------------------------------------------------------------------------------------------------|----------------------------------------------------------------|
| <input type="text"/> | <input type="text"/> <input type="text"/> / <input type="text"/> <input type="text"/> <input type="text"/> / <input type="text"/> <input type="text"/> <input type="text"/> <input type="text"/><br>DD                      MMM                      YYYY | <input type="text"/> <input type="text"/> <input type="text"/> |

|                         |                         |
|-------------------------|-------------------------|
| <hr/> <hr/> <hr/> <hr/> | <hr/> <hr/> <hr/> <hr/> |
|-------------------------|-------------------------|

**45. With or without previous training, would you be interested ImSc training or skills?**

|                                                        |                         |
|--------------------------------------------------------|-------------------------|
| <input type="checkbox"/> Yes → Reasons for interest?   | <hr/> <hr/> <hr/> <hr/> |
| <input type="checkbox"/> No → Reasons for no Interest? | <hr/> <hr/> <hr/> <hr/> |

End Questionnaire here if Answered **NO** to 45

|                                                                                            |                                                                                                                                                                        |
|--------------------------------------------------------------------------------------------|------------------------------------------------------------------------------------------------------------------------------------------------------------------------|
| <b>46. What would the impact of this training be on your current work and career path?</b> | <b>47. If Yes, how important was this training to your career. On a scale of 1-3 (not so important-3 Very important) please grade importance of the ImSc training?</b> |
|--------------------------------------------------------------------------------------------|------------------------------------------------------------------------------------------------------------------------------------------------------------------------|

|             |                                                                                                                                     |
|-------------|-------------------------------------------------------------------------------------------------------------------------------------|
| <hr/> <hr/> | <input type="checkbox"/> Very important<br><input type="checkbox"/> Somewhat important<br><input type="checkbox"/> Not so important |
|-------------|-------------------------------------------------------------------------------------------------------------------------------------|

**48. Existing level of core ImSc proficiencies among target trainees.**  
 For the following set of questions we are going to inquire about your proficiency in specific skills that are required in ImSc. On a Scale of 5-Excellent to 1-Poor, how well do you assess your skills in these areas?

| Core ImSc competency                                                                                                                                            | Excellent<br>(5)         | Good<br>(4)              | Fair<br>(3)              | Poor<br>(2)              | Very Poor<br>(1)         |
|-----------------------------------------------------------------------------------------------------------------------------------------------------------------|--------------------------|--------------------------|--------------------------|--------------------------|--------------------------|
| a. Formation of multidisciplinary teams that blend relevant disciplines and skills to address and implementation problem                                        | <input type="checkbox"/> | <input type="checkbox"/> | <input type="checkbox"/> | <input type="checkbox"/> | <input type="checkbox"/> |
| b. Ability to identify a range of factors, behavioral, socio-ecological, institutional, etc... that inform implementation questions and problem prioritization? | <input type="checkbox"/> | <input type="checkbox"/> | <input type="checkbox"/> | <input type="checkbox"/> | <input type="checkbox"/> |
| c. Ability and skills to build relationships with communities and stakeholders to engage in multiple approaches?                                                | <input type="checkbox"/> | <input type="checkbox"/> | <input type="checkbox"/> | <input type="checkbox"/> | <input type="checkbox"/> |
| d. Ability to Integrate behavior change theories into various intervention designs to enhance translation?                                                      | <input type="checkbox"/> | <input type="checkbox"/> | <input type="checkbox"/> | <input type="checkbox"/> | <input type="checkbox"/> |
| e. Ability to select frameworks that reflect diverse views to guide intervention design and implementation                                                      | <input type="checkbox"/> | <input type="checkbox"/> | <input type="checkbox"/> | <input type="checkbox"/> | <input type="checkbox"/> |
| f. Able to select appropriate outcome and impact measures to evaluate effects of translational activities?                                                      | <input type="checkbox"/> | <input type="checkbox"/> | <input type="checkbox"/> | <input type="checkbox"/> | <input type="checkbox"/> |
